# Supplementary material
Source: PubMed Central journal article supplement (PMC8276581)
Supplement: NIHMS1707395-supplement-final_PDF.pdf [file NIHMS1707395-supplement-final_PDF.pdf]

## Supporting Information

### **Antibodies that engage the hemagglutinin receptor-binding site of influenza B viruses**

Goran Bajic<sup>1,2,\*</sup>, ‡ and Stephen C. Harrison<sup>1,3</sup>

<sup>1</sup>Laboratory of Molecular Medicine, Boston Children's Hospital, Harvard Medical School, Boston, Massachusetts 02115 USA

<sup>2</sup>Department of Pediatrics, Harvard Medical School, Boston, Massachusetts 02115 USA

<sup>3</sup>Howard Hughes Medical Institute, Boston, Massachusetts 02115 USA

‡current address: Department of Microbiology, Icahn School of Medicine at Mount Sinai, New York, New York 10029 USA

\*correspondence: Goran Bajic ([goran.bajic@mssm.edu](mailto:goran.bajic@mssm.edu))



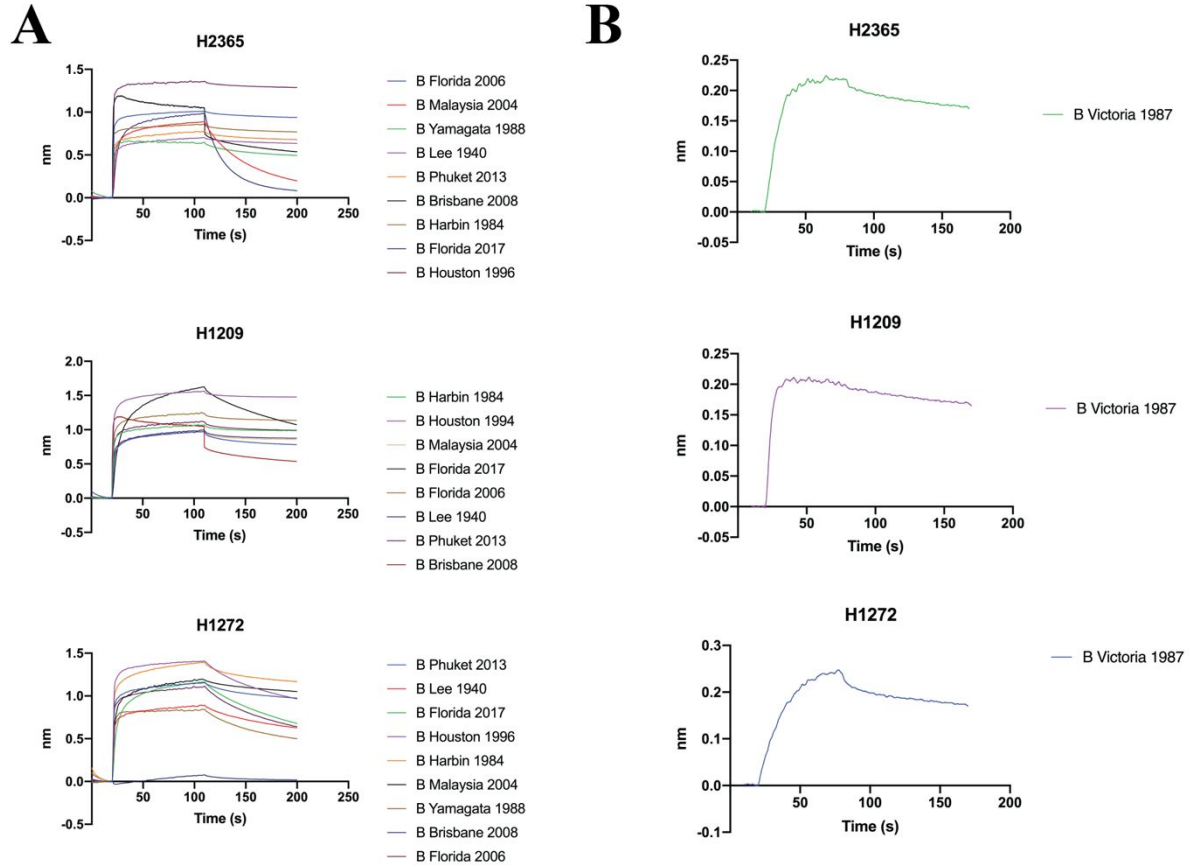

**Figure S2. Details of the affinity measurements.**

Bio-layer interferometry binding isotherms of Fab:HA interactions. HA was immobilized on a Ni<sup>2+</sup>-NTA sensor and Fabs were applied in the mobile phase. All measurements were done with Fabs and HA1 head (A) or full-length HA. Dissociation affinity constants ( $K_D$ s) were calculated with a 1:1 binding model using the manufacturer's software.

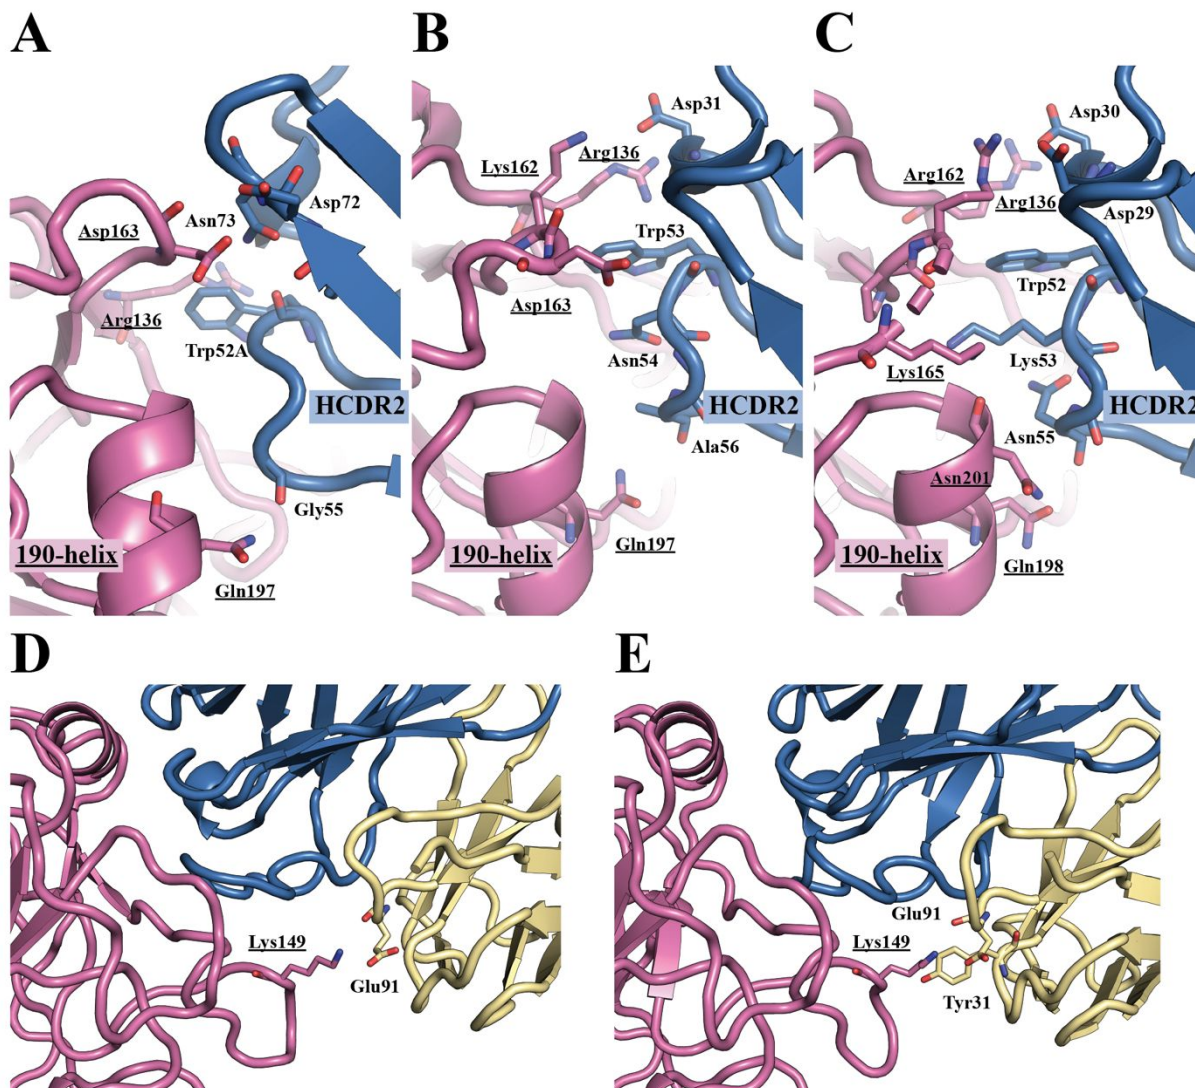

**Figure S3. Details of additional molecular interactions at the HA:antibody interface.** Additional contacts between the antibody HCDR2 and the HA 190-helix are indicated for the H2365 (A), H1209 (B) and H1272 (C) complexes respectively. Light chain contacts for H2365 and H1272 are shown in (D) and (E), respectively. The electron density map was of lesser quality for the H1209 complex in the 150-loop region of HA and the details of side-chain contacts are omitted. HA residues are underlined.

**A**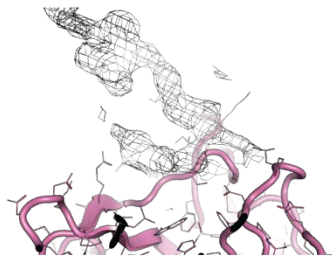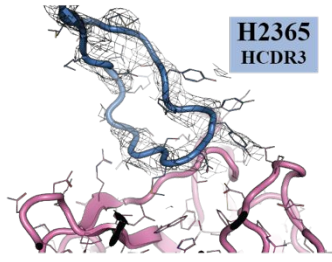**B/Phuket****B**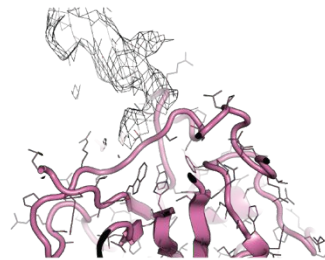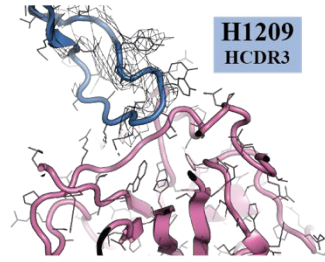**B/Yamagata**

**Figure S4. Composite annealed omit maps of the Fab HCDR3.**

Composite maps with simulated annealing calculated after refinement of the molecular replacement model and omitting the atoms in the Fab HCDR3 of H2365 (A) and H1209 (B). Maps are contoured at  $1\sigma$ .

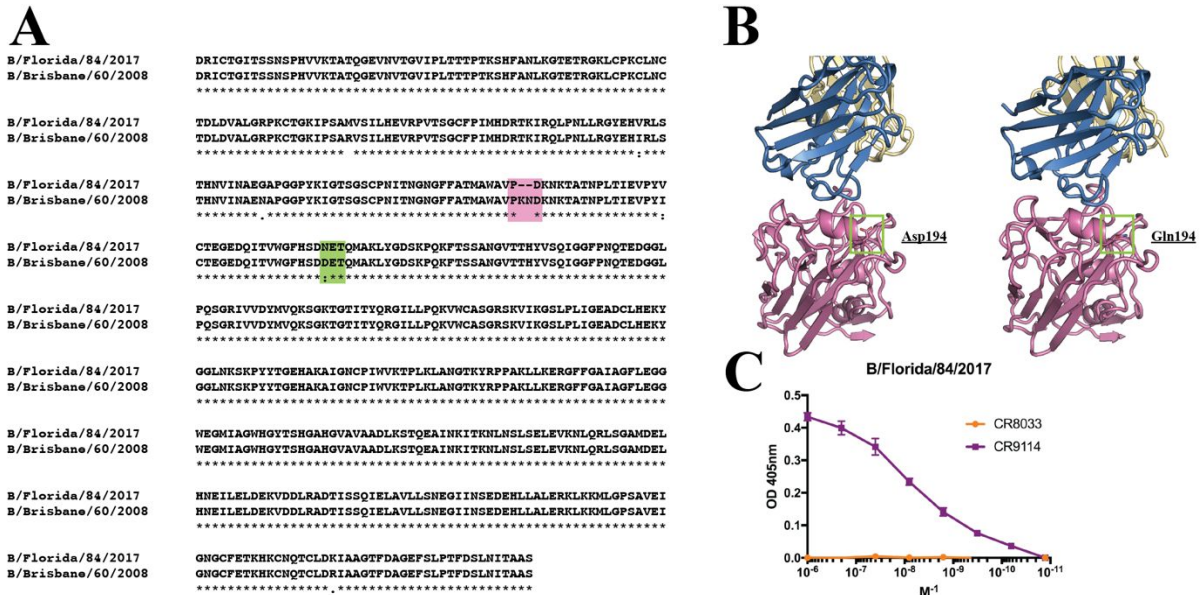

**Figure S5. Antigenic evolution of contemporary B Victoria HAs.**

Sequence alignment of the contemporary B/Florida/84/2017 and the vaccine strain that the donors received B/Brisbane/60/2008. Noted differences include a 2 amino-acid deletion in the 160-loop (pink) and an N-linked glycosylation site (green). The position of the putative N-linked glycosylation site is shown on the structures of the H2365 and H1272 complexes (B). ELISA reactivity of the contemporary Victoria lineage member B/Florida/84/2017 against two reference Crucell antibodies – an RBS-directed CR8033 and a stem-directed CR9114. Reactivity with CR8033 is lost likely due to the differences highlighted in (A).

**Table S1. Data collection and refinement statistics.**

|                                                   | H2365:B/Phuket                   | H1209:B/Yamagata                | H1272:B/Yamagata               |
|---------------------------------------------------|----------------------------------|---------------------------------|--------------------------------|
| <b>Data collection and processing</b>             |                                  |                                 |                                |
| <b>Wavelength (Å)</b>                             | 0.97910                          | 0.97918                         | 0.97868                        |
| <b>Resolution range (Å)</b>                       | 114.9 - 3.5<br>(3.62 - 3.5)      | 49.61 - 4.2<br>(4.35 - 4.2)     | 45.6 - 2.6<br>(2.69 - 2.6)     |
| <b>Space group</b>                                | P 31                             | P 61 2 2                        | P 21 21 21                     |
| <b>Unit cell (Å)<sup>o</sup></b>                  | 132.66 132.66 93.13<br>90 90 120 | 128.1 128.1 235.28<br>90 90 120 | 40.13 77.44 225.65<br>90 90 90 |
| <b>Total reflections</b>                          | 145358 (14187)                   | 183563 (36009)                  | 179872 (18129)                 |
| <b>Unique reflections</b>                         | 23115 (2250)                     | 8923 (1603)                     | 22578 (2229)                   |
| <b>Multiplicity</b>                               | 6.3 (6.2)                        | 20.6 (22.5)                     | 8.0 (8.1)                      |
| <b>Completeness (%)</b>                           | 99.65 (97.49)                    | 99.7 (100.00)                   | 99.91 (100.00)                 |
| <b>Mean I/sigma(I)</b>                            | 5.45 (0.20)                      | 4.64 (0.75)                     | 12.26 (2.78)                   |
| <b>Wilson B-factor</b>                            | 180.84                           | 195                             | 31.25                          |
| <b>R-merge</b>                                    | 0.261 (6.242)                    | 0.8007 (7.489)                  | 0.1782 (0.8381)                |
| <b>R-meas</b>                                     | 0.2849 (6.823)                   | 0.8224 (7.66)                   | 0.1905 (0.8961)                |
| <b>CC1/2</b>                                      | 0.994 (0.0935)                   | 0.995 (0.294)                   | 0.994 (0.827)                  |
| <b>CC*</b>                                        | 0.999 (0.413)                    | 0.999 (0.674)                   | 0.998 (0.952)                  |
| <b>Refinement</b>                                 |                                  |                                 |                                |
| <b>No. reflections</b>                            | 23046                            | 8861                            | 22570                          |
| <b>Rwork/Rfree</b>                                | 0.25/0.30                        | 0.38/0.42                       | 0.23/0.28                      |
| <b>RMS (bonds/angles)</b>                         | 0.004/0.71                       | 0.003/0.71                      | 0.005/1.11                     |
| <b>Ramachandran favoured/allowed/outliers (%)</b> | 91.41/8.13/0.46                  | 94.53/5.31/0.16                 | 96.61/3.24/0.15                |
| <b>Clashscore</b>                                 | 14.29                            | 14.74                           | 10.92                          |
| <b>Average B-factor</b>                           | 180                              | 193                             | 37                             |

Statistics for the highest-resolution shell are shown in parentheses.
